# Supplementary material
Source: Springer Nature journal article supplement (https://www.springermedizin.de/resource/supplementary/12871_2007_56_MOESM1_ESM.pdf/9429558)

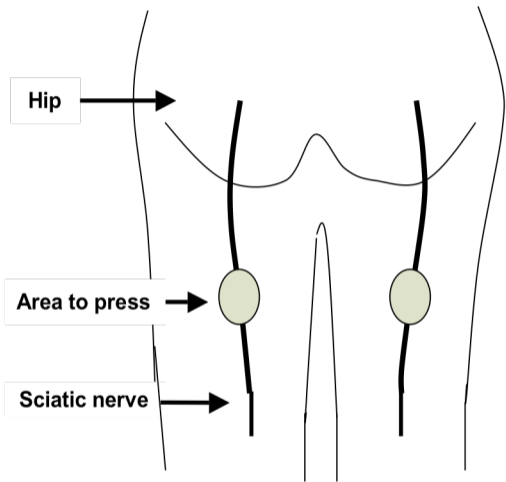

A

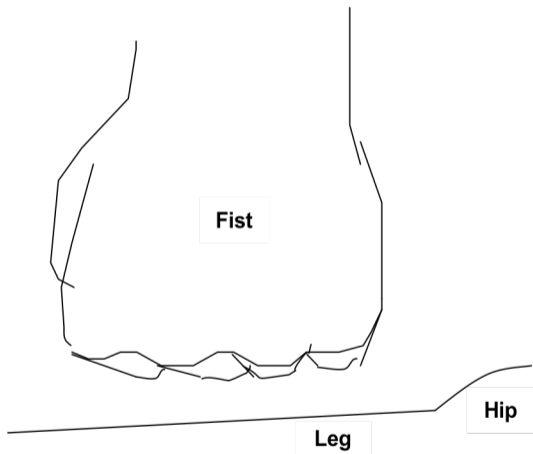

B

Supplement: MOESM1 [file 9429558]
